# Supplementary material for: The southern Gulf of Mexico: A baseline radiocarbon isoscape of surface sediments and isotopic excursions at depth
Source: PLOS journal article supplement (doi:10.1371/journal.pone.0231678), 2020-04-15
Supplement: S2 (10.1371/journal.pone.0231678.s002) [file journal.pone.0231678.s002]

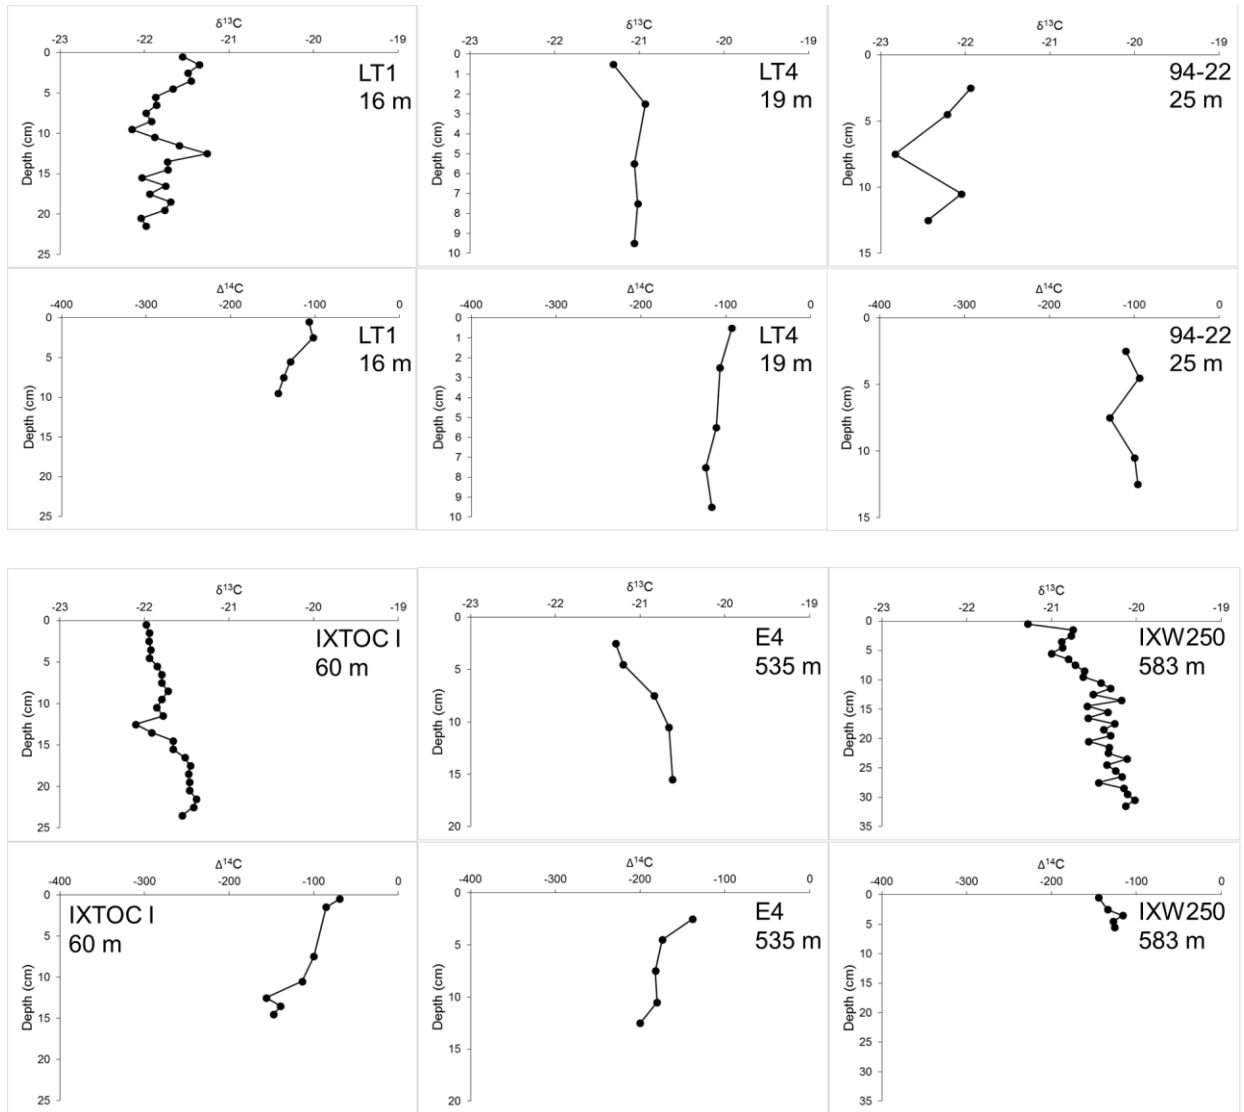

**S1 Fig. Isotopic ( $\delta^{13}\text{C}$  and  $\Delta^{14}\text{C}$ ) core profiles for the remaining 18 cores examined in the southern Gulf of Mexico. Cores are ordered from shallowest water depth to deepest water depth**

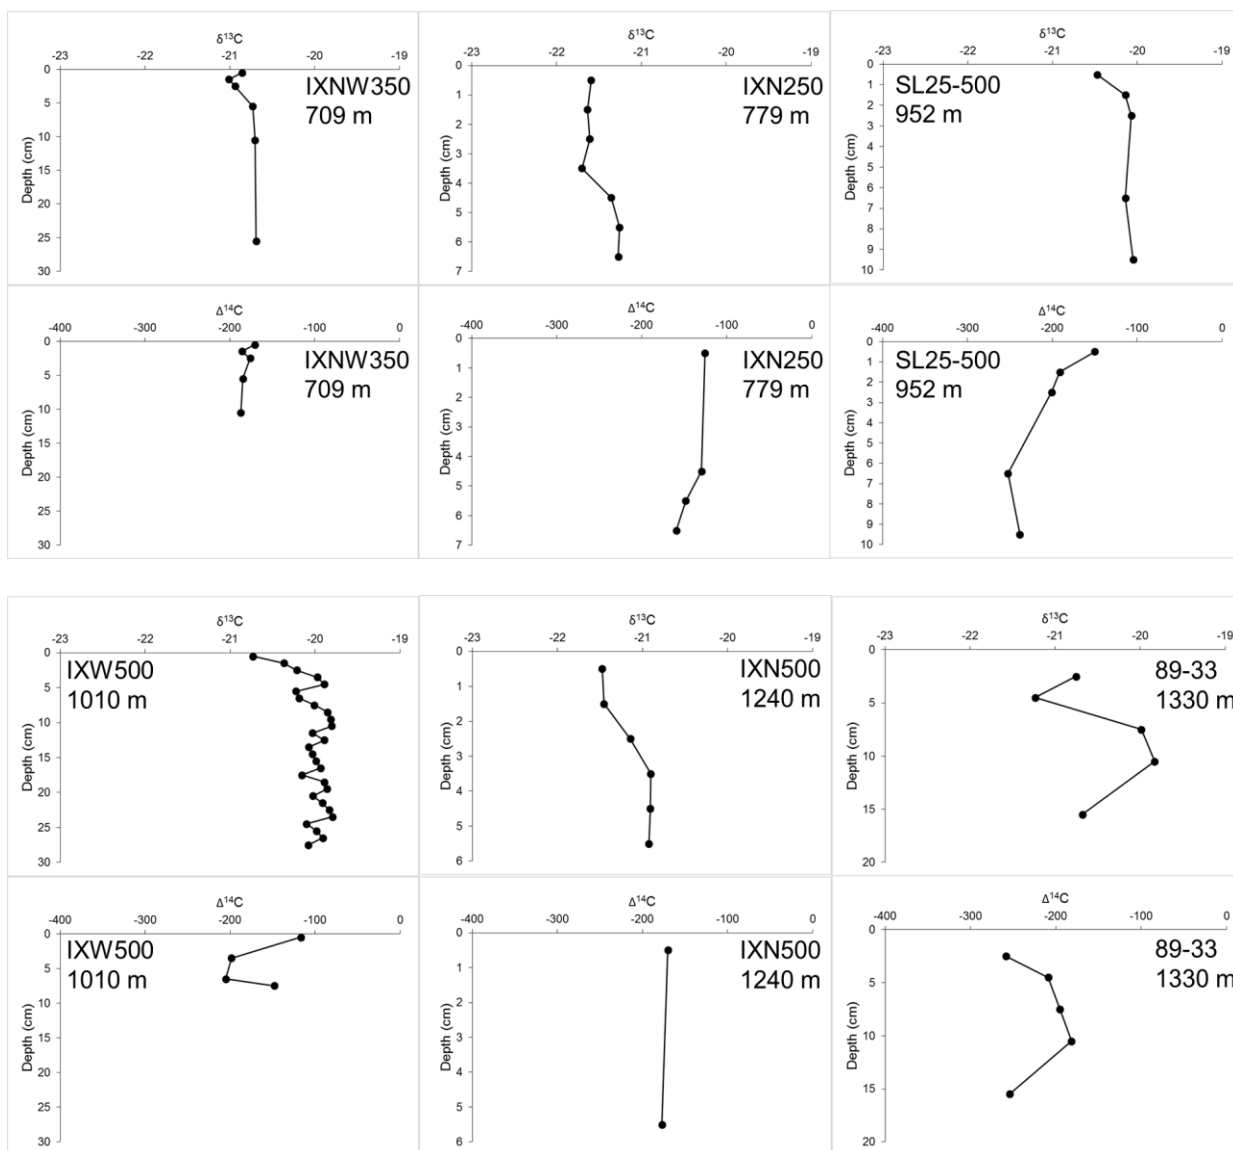

**S1 Fig. Continued.**

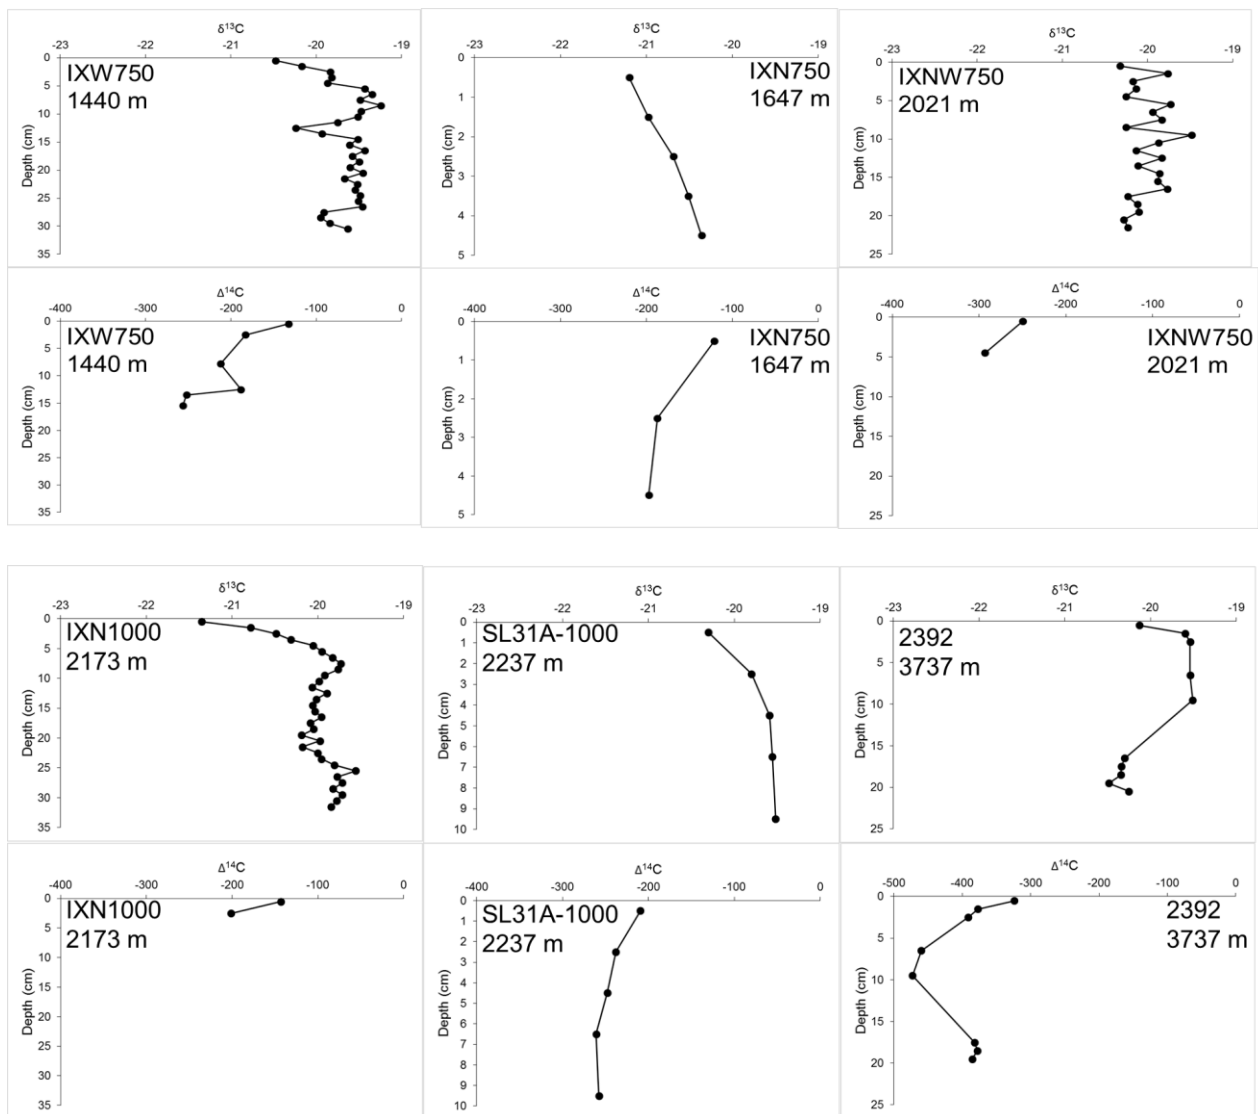

**S1 Fig. Continued.**
